# Supplementary material for: Intrauterine and Postnatal Exposure to High Levels of Fluoride Is Associated with Motor Impairments, Oxidative Stress, and Morphological Damage in the Cerebellum of Offspring Rats
Source: MDPI journal article supplement (doi:10.3390/ijms23158556), 2022-08-02
Supplement: s1 [file s1]

**Table S1.** Description of all analysis values of the study.

| Analysis               | Description of unit   | Mean (Control) | SD (Control) | SEM (Control) | Mean (10 mg F/L) | SD (10 mg F/L) | SEM (10 mg F/L) | Mean (50 mg F/L) | SD (50 mg F/L) | SEM (50 mg F/L) | Power (1- $\beta$ err prob)                                       |
|------------------------|-----------------------|----------------|--------------|---------------|------------------|----------------|-----------------|------------------|----------------|-----------------|-------------------------------------------------------------------|
| ACAP                   | % of control          | 100            | 1.934        | 0.789         | 95.95            | 1.185          | 0.530           | 91.33            | 1.074          | 0.438           | Control vs 10: 97.9%<br>Control vs 50: 100%<br>10 vs 50: 100%     |
| LPO                    | % of control          | 100            | 0.055        | 0.249         | 100.2            | 0.058          | 0.026           | 100.2            | 0.073          | 0.032           | Control vs 10: 99.99%<br>Control vs 50: 99.83%<br>10 vs 50: 1.07% |
| Purkinje cells density | Number per field      | 11.38          | 1.109        | 0.554         | 10.83            | 1              | 0.5             | 8.75             | 1.45           | 0.724           | Control vs 10: 12.76%<br>Control vs 50: 89.65%<br>10 vs 50: 75.2% |
| NeuN                   | Cells/mm <sup>2</sup> | 61.79          | 11.12        | 4.974         | 55.72            | 12.12          | 6.059           | 55.27            | 6.194          | 2.529           | Control vs 10: 12.79%<br>Control vs 50: 20.77%<br>10 vs 50: 1.84% |
| MBP                    | Area fraction (%)     | 14.27          | 2.128        | 1.064         | 13.37            | 1.938          | 0.969           | 10.01            | 1.104          | 0.551           | Control vs 10: 10.3%<br>Control vs 50: 97.8%<br>10 vs 50: 92.05%  |
| SYP                    | Area Fraction (%)     | 9.816          | 2.492        | 1.246         | 10.15            | 1.724          | 0.862           | 8.973            | 2.102          | 1.214           | Control vs 10: 3.72%<br>Control vs 50: 8.20%<br>10 vs 50: 16.06%  |
| Rearings               | Number                | 2.556          | 1.236        | 0.412         | 2.8              | 1.643          | 0.734           | 0.5              | 0.940          | 0.251           | Control vs 10: 7.46%<br>Control vs 50: 100%<br>10 vs 50: 99.97%   |
| Fall angle             | °                     | 51.25          | 5.825        | 2.059         | 46.67            | 5              | 1.667           | 42.33            | 3.2            | 0.826           | Control vs 10: 76.06%<br>Control vs 50: 100%<br>10 vs 50: 90.49%  |
| Time for fall          | Seconds               | 55             | 4.243        | 1.5           | 50               | 5.612          | 1.871           | 44.93            | 3.025          | 0.808           | Control vs 10: 88.85%<br>Control vs 50: 100%<br>10 vs 50: 94.48%  |

**Table S1:** Oxidative biochemistry assays (ACAP: Antioxidant Capacity Against Peroxyl Radicals and LPO: Lipid Peroxidation), Histological analysis (Purkinje cells density, Anti-NeuN, Anti-Myelin Basic Protein and Anti-Synaptophysin) and Behavior tests (Rearings and Inclined Plane [Fall angle and Time for fall]) values of the experimental study. Results are expressed as mean, SD: Standard deviation, SEM: Standard error of mean and Test Power (1- $\beta$  error probability).
